# Supplementary material
Source: publisher figshare collection journal article supplement (https://sage.figshare.com/ndownloader/files/23166776)
Supplement: Supplementary file 1 [file 23166776]

**Table S1. Degree of remission from first relapse**

|                                               |                        | Degree of relapse remission, number (%) |            |            |                               |
|-----------------------------------------------|------------------------|-----------------------------------------|------------|------------|-------------------------------|
|                                               |                        | Complete                                | Partial    | None       | Unknown<br>(no documentation) |
| Domain<br>affected in<br>the first 2<br>years | Cerebellar<br>n = 2723 | 652 (24%)                               | 489 (18%)  | 32 (1.2%)  | 1189 (44%)                    |
|                                               | Brainstem<br>n = 3915  | 1151 (29%)                              | 542 (14%)  | 35 (0.9%)  | 1773 (45%)                    |
|                                               | Pyramidal<br>n = 5530  | 1457 (26%)                              | 932 (17%)  | 74 (1.3%)  | 2340 (42%)                    |
| Study cohort<br>n = 10513                     |                        | 2922 (27%)                              | 1493 (14%) | 116 (1.1%) | 4648 (44%)                    |

**Table S2. Number of patients not exposed to DMT in the first 2 years**

|                                               |                        | Number of patients not exposed to DMT in the first 2 years (%) |
|-----------------------------------------------|------------------------|----------------------------------------------------------------|
| Domain<br>affected in<br>the first 2<br>years | Cerebellar<br>n = 2723 | 393 (14%)                                                      |
|                                               | Brainstem<br>n = 3915  | 635 (16%)                                                      |
|                                               | Pyramidal<br>n = 5530  | 848 (15%)                                                      |
| Study cohort<br>n = 10513                     |                        | 1719 (16%)                                                     |

**Table S3. Disability outcomes of patients with early visual and sensory symptoms**

| Domain<br>affected in the<br>first 2 years | n<br>(% cohort) | EDSS scores<br>(Mixed effect models) |         | Disability progression<br>(Andersen-Gill models) |         |
|--------------------------------------------|-----------------|--------------------------------------|---------|--------------------------------------------------|---------|
|                                            |                 | $\beta$ (95%CI)                      | P value | HR (95% CI)                                      | P value |
| Visual                                     | 4053<br>(38.6%) | -0.05<br>(-0.06 – -0.04)             | <0.001  | 0.92<br>(0.85 – 1.01)                            | 0.07    |
| Sensory                                    | 7287<br>(69.3%) | -0.04<br>(-0.05 – -0.02)             | <0.001  | 0.84<br>(0.76 – 0.93)                            | <0.001  |

Figure S1. Time from disease onset to treatment initiation

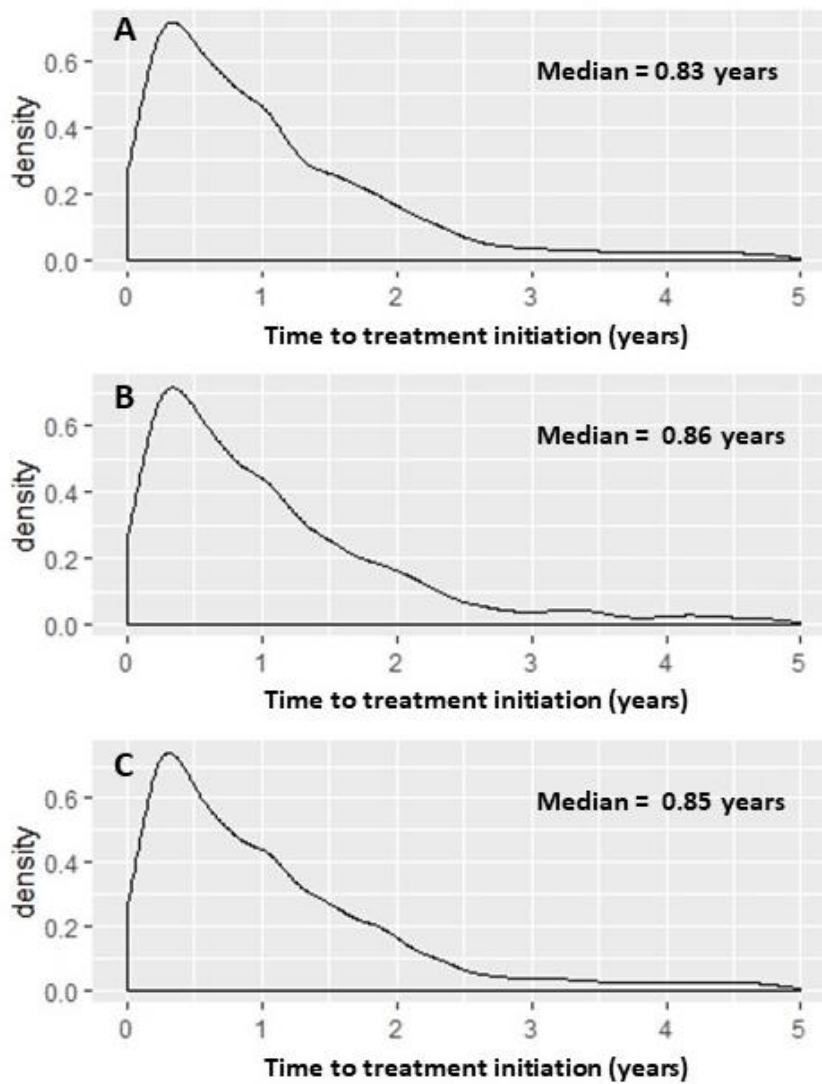

Distribution of time from disease onset to treatment initiation (in years), stratified by the presence of early cerebellar (A), brainstem(B) and pyramidal (C) symptoms.
